# Supplementary material for: The application of stop-flow microwave technology to scaling-out SNAr reactions using a soluble organic base
Source: Royal Society of Chemistry journal article supplement (doi:10.1039/b926537f), 2010-01-01
Supplement: b926537f hplcs.pdf [file b926537f%20hplcs.pdf]

Sample Name: 01-kzpp760-86-prod

Supplementary Material (ESI) for Organic &amp; Biomolecular Chemistry

This journal is © The Royal Society of Chemistry 2010

=====  
 Acq. Operator : Jameel Marafie  
 Acq. Instrument : ACLC045 Location : Vial 61  
 Injection Date : 16/03/2009 12:01:39 Inj Volume : 2 µl  
 Acq. Method : C:\Chem32\1\METHODS\GENERIC3A.M  
 Last changed : 16/03/2009 12:00:54 by Jameel Marafie  
 Analysis Method : C:\Chem32\1\METHODS\STANDBY.M  
 Last changed : 03/11/2009 17:14:32 by JMoseley  
 Method Info : Standby method

Sample Info : =====  
 Column: 3 Polaris Amide

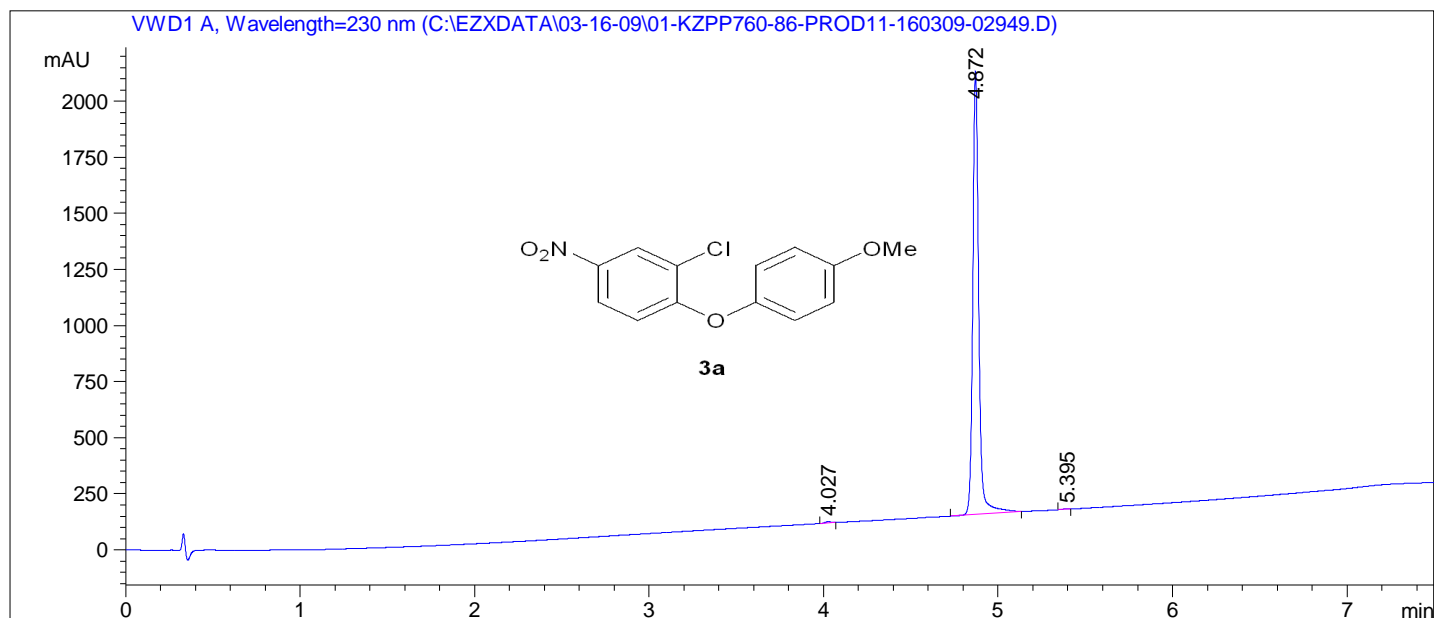

=====  
 Area Percent Report  
 =====

Sorted By : Signal  
 Multiplier : 1.0000  
 Dilution : 1.0000  
 Use Multiplier & Dilution Factor with ISTDs

Signal 1: VWD1 A, Wavelength=230 nm

| Peak # | RetTime [min] | Type | Width [min] | Area mAU*s | Height [mAU] | Area %  |
|--------|---------------|------|-------------|------------|--------------|---------|
| 1      | 4.027         | BB   | 0.0382      | 12.63399   | 5.13519      | 0.2643  |
| 2      | 4.872         | BB   | 0.0369      | 4763.15918 | 1973.33826   | 99.6529 |
| 3      | 5.395         | BB   | 0.0349      | 3.95565    | 1.76561      | 0.0828  |

Totals : 4779.74882 1980.23906

=====  
 Summed Peaks Report  
 =====

Signal 1: VWD1 A, Wavelength=230 nm

Sample Name: 02-kzpp760-13-prod

Supplementary Material (ESI) for Organic &amp; Biomolecular Chemistry

This journal is © The Royal Society of Chemistry 2010

```

=====
Acq. Operator   : Jameel Marafie
Acq. Instrument : ACLC045
Injection Date  : 11/05/2009 10:12:52
Location       : Vial 40
Inj Volume     : 2 µl
Acq. Method    : C:\Chem32\1\METHODS\GENERIC3A.M
Last changed   : 11/05/2009 10:12:15 by Jameel Marafie
Analysis Method : C:\Chem32\1\METHODS\STANDBY.M
Last changed   : 03/11/2009 17:14:32 by JMoseley
Method Info    : Standby method
  
```

```

Sample Info    : =====
                  Column: 3 Polaris Amide
  
```

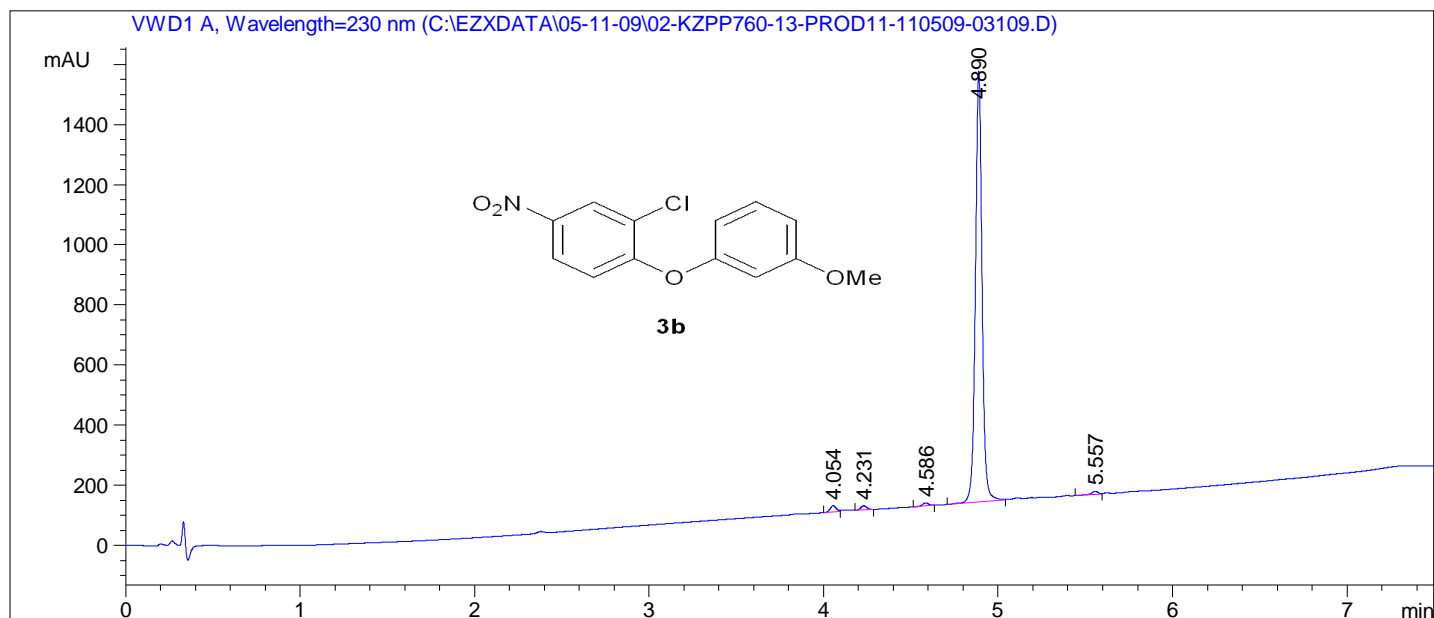

```

=====
Area Percent Report
=====
  
```

```

Sorted By      : Signal
Multiplier     : 1.0000
Dilution       : 1.0000
Use Multiplier & Dilution Factor with ISTDs
  
```

Signal 1: VWD1 A, Wavelength=230 nm

| Peak # | RetTime [min] | Type | Width [min] | Area mAU*s | Height [mAU] | Area %  |
|--------|---------------|------|-------------|------------|--------------|---------|
| 1      | 4.054         | BV   | 0.0373      | 50.27900   | 21.05592     | 1.2844  |
| 2      | 4.231         | BB   | 0.0375      | 32.66526   | 13.61510     | 0.8344  |
| 3      | 4.586         | BB   | 0.0371      | 23.63815   | 9.99124      | 0.6038  |
| 4      | 4.890         | BV   | 0.0403      | 3781.26904 | 1431.59033   | 96.5930 |
| 5      | 5.557         | BV   | 0.0400      | 26.78875   | 10.24706     | 0.6843  |

```
Totals :                3914.64020 1486.49965
```

```

=====
Summed Peaks Report
=====
  
```

Signal 1: VWD1 A, Wavelength=230 nm

=====  
 Acq. Operator : Jameel Marafie  
 Acq. Instrument : ACLC045 Location : Vial 84  
 Injection Date : 30/04/2009 10:39:27 Inj Volume : 2 µl  
 Acq. Method : C:\Chem32\1\METHODS\GENERIC3A.M  
 Last changed : 30/04/2009 10:37:03 by Jameel Marafie  
 Analysis Method : C:\Chem32\1\METHODS\STANDBY.M  
 Last changed : 03/11/2009 17:14:32 by JMoseley  
 Method Info : Standby method

Sample Info : =====  
 Column: 3 Polaris Amide

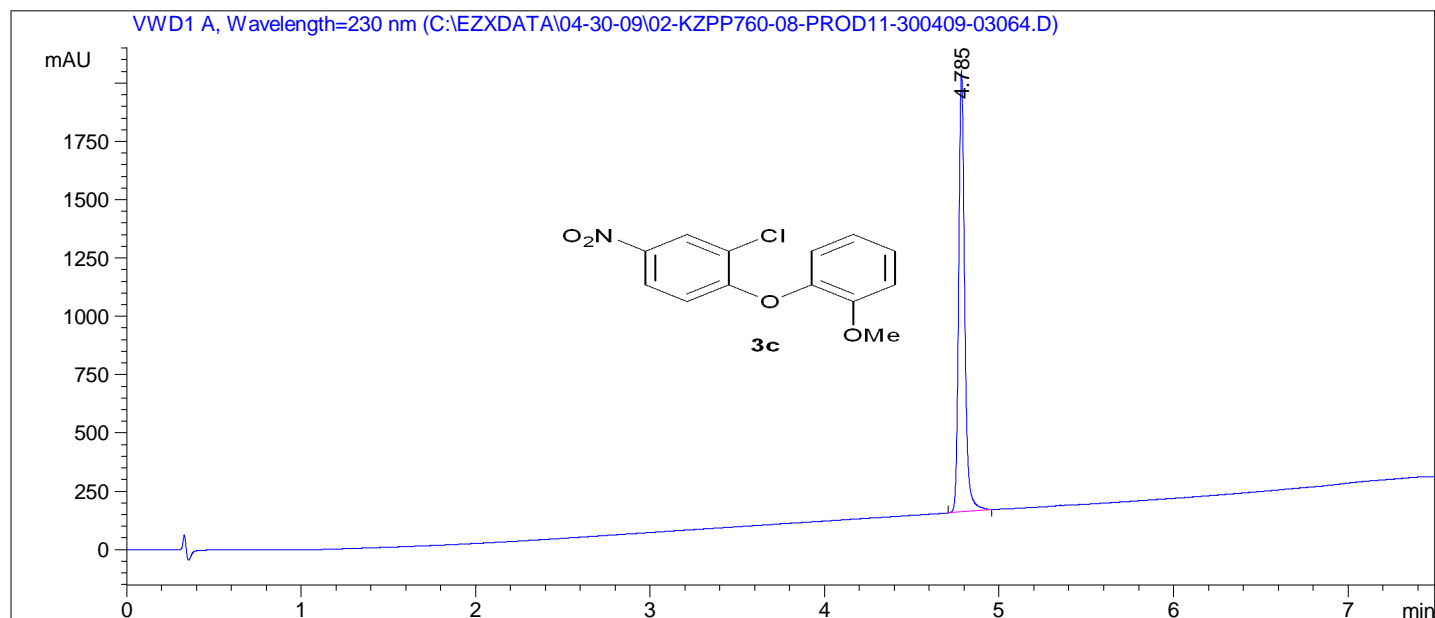

=====  
 Area Percent Report  
 =====

Sorted By : Signal  
 Multiplier : 1.0000  
 Dilution : 1.0000  
 Use Multiplier & Dilution Factor with ISTDs

Signal 1: VWD1 A, Wavelength=230 nm

| Peak # | RetTime [min] | Type | Width [min] | Area mAU*s | Height [mAU] | Area %   |
|--------|---------------|------|-------------|------------|--------------|----------|
| 1      | 4.785         | BB   | 0.0365      | 4489.50000 | 1887.59973   | 100.0000 |

Totals : 4489.50000 1887.59973

=====  
 Summed Peaks Report  
 =====

Signal 1: VWD1 A, Wavelength=230 nm

=====  
 Final Summed Peaks Report  
 =====

Signal 1: VWD1 A, Wavelength=230 nm

Sample Name: 01-kzpp760-94-prod

Supplementary Material (ESI) for Organic &amp; Biomolecular Chemistry

This journal is © The Royal Society of Chemistry 2010

=====  
 Acq. Operator : Jameel Marafie  
 Acq. Instrument : ACLC045 Location : Vial 25  
 Injection Date : 31/03/2009 10:59:20 Inj Volume : 2 µl  
 Acq. Method : C:\Chem32\1\METHODS\GENERIC3A.M  
 Last changed : 31/03/2009 10:58:27 by Jameel Marafie  
 Analysis Method : C:\Chem32\1\METHODS\STANDBY.M  
 Last changed : 03/11/2009 17:14:32 by JMoseley  
 Method Info : Standby method

Sample Info : =====  
 Column: 3 Polaris Amide

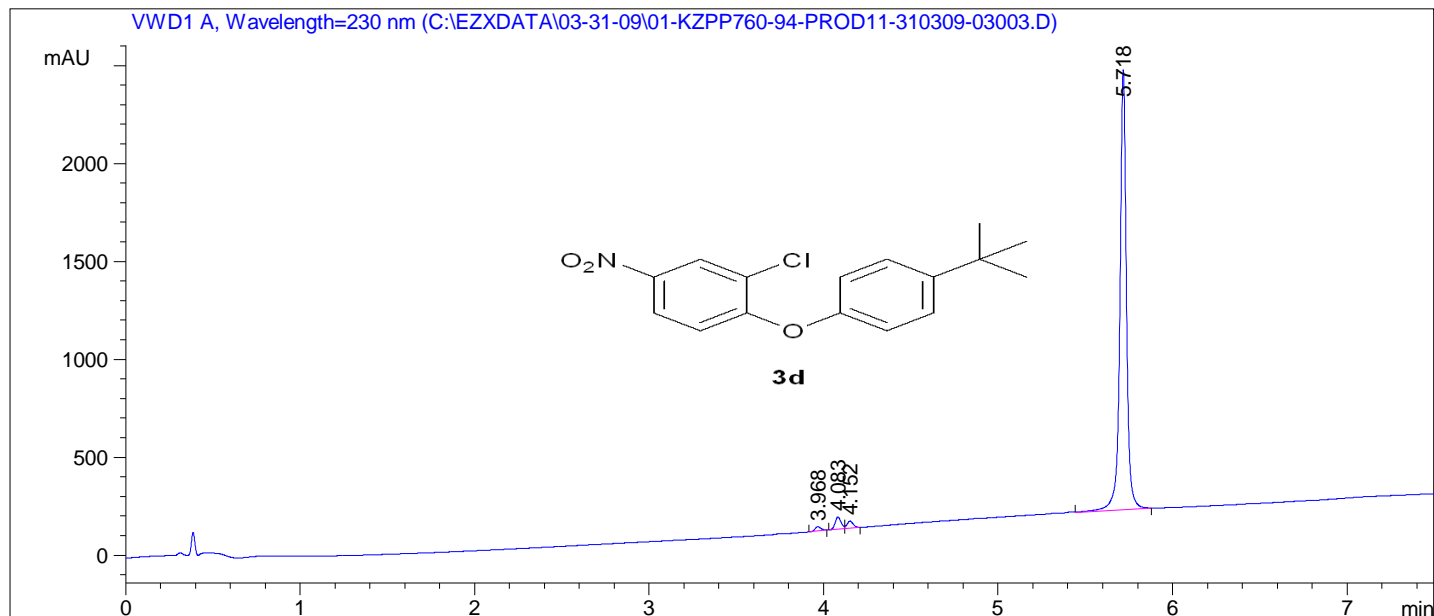

=====  
 Area Percent Report  
 =====

Sorted By : Signal  
 Multiplier : 1.0000  
 Dilution : 1.0000  
 Use Multiplier & Dilution Factor with ISTDs

Signal 1: VWD1 A, Wavelength=230 nm

| Peak # | RetTime [min] | Type | Width [min] | Area mAU*s | Height [mAU] | Area %  |
|--------|---------------|------|-------------|------------|--------------|---------|
| 1      | 3.968         | BB   | 0.0359      | 51.65430   | 22.18423     | 0.8392  |
| 2      | 4.083         | BV   | 0.0375      | 151.91650  | 63.11425     | 2.4680  |
| 3      | 4.152         | VB   | 0.0375      | 89.88761   | 36.44707     | 1.4603  |
| 4      | 5.718         | VV   | 0.0392      | 5861.98438 | 2247.13892   | 95.2325 |

Totals : 6155.44279 2368.88447

=====  
 Summed Peaks Report  
 =====

Signal 1: VWD1 A, Wavelength=230 nm

Sample Name: 01-kzpp760-92-prod

Supplementary Material (ESI) for Organic &amp; Biomolecular Chemistry

This journal is © The Royal Society of Chemistry 2010

=====  
 Acq. Operator : Jameel Marafie  
 Acq. Instrument : ACLC045 Location : Vial 3  
 Injection Date : 23/03/2009 09:42:09 Inj Volume : 2 µl  
 Acq. Method : C:\Chem32\1\METHODS\GENERIC3A.M  
 Last changed : 23/03/2009 09:41:48 by Jameel Marafie  
 Analysis Method : C:\Chem32\1\METHODS\STANDBY.M  
 Last changed : 03/11/2009 17:14:32 by JMoseley  
 Method Info : Standby method

Sample Info : =====  
 Column: 3 Polaris Amide

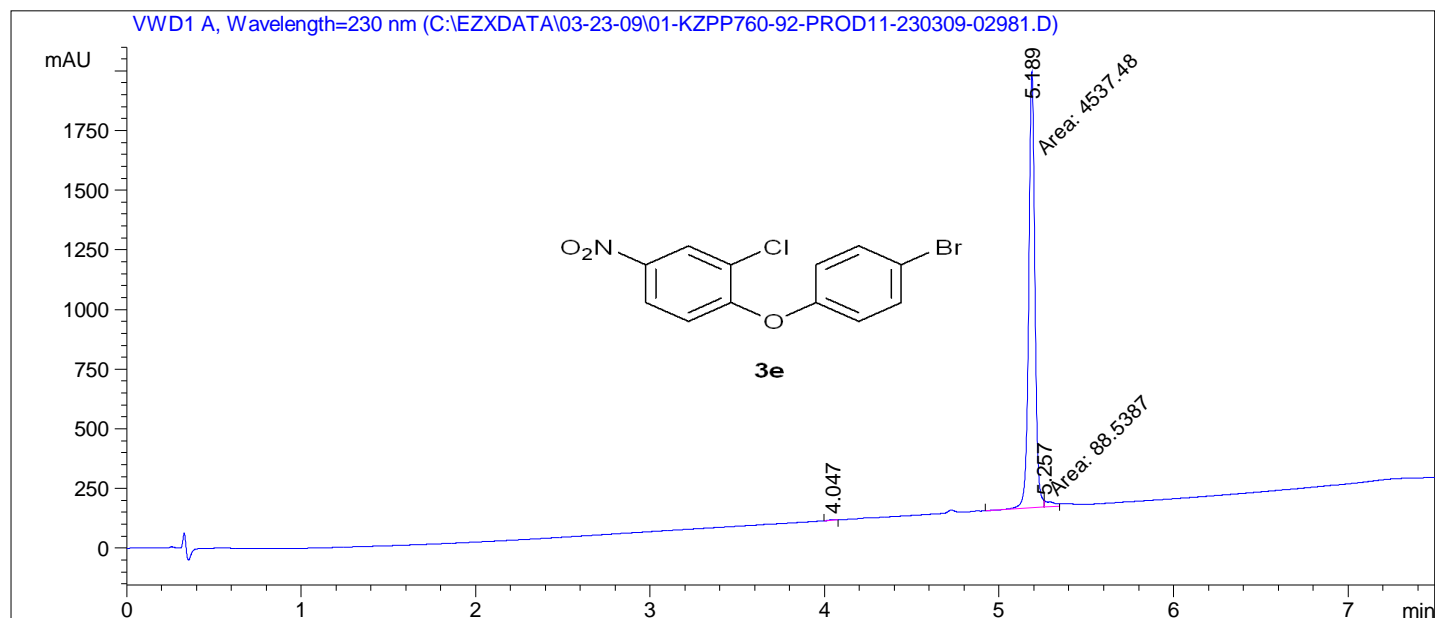

=====  
 Area Percent Report  
 =====

Sorted By : Signal  
 Multiplier : 1.0000  
 Dilution : 1.0000  
 Use Multiplier & Dilution Factor with ISTDs

Signal 1: VWD1 A, Wavelength=230 nm

| Peak # | RetTime [min] | Type | Width [min] | Area mAU*s | Height [mAU] | Area %  |
|--------|---------------|------|-------------|------------|--------------|---------|
| 1      | 4.047         | BB   | 0.0342      | 6.90091    | 3.25076      | 0.1490  |
| 2      | 5.189         | MF   | 0.0413      | 4537.47510 | 1831.36768   | 97.9400 |
| 3      | 5.257         | FM   | 0.0442      | 88.53869   | 27.88732     | 1.9111  |

Totals : 4632.91470 1862.50576

=====  
 Summed Peaks Report  
 =====

Signal 1: VWD1 A, Wavelength=230 nm

=====  
Acq. Operator : Jameel Marafie  
Acq. Instrument : ACLC045 Location : Vial 37  
Injection Date : 15/04/2009 09:01:48 Inj Volume : 2 µl  
Acq. Method : C:\Chem32\1\METHODS\GENERIC3A.M  
Last changed : 15/04/2009 08:59:39 by Jameel Marafie  
Analysis Method : C:\Chem32\1\METHODS\GENERIC3A.M  
Last changed : 25/06/2007 13:18:05 by JMoseley  
Method Info : Generic Method 3A  
Polaris Amide, 3µm, 50 x 3.0mm  
M.P.A: 0.03%TFA in Water, M.P.B: 0.03%TFA in ACN  
Gradient: 5-95% in 6min, run time: 7.5min  
Inj Vol.: 2ul, Det: 230nm, Flow: 1.25ml/min

Sample Info : =====  
Column: 3 Polaris Amide

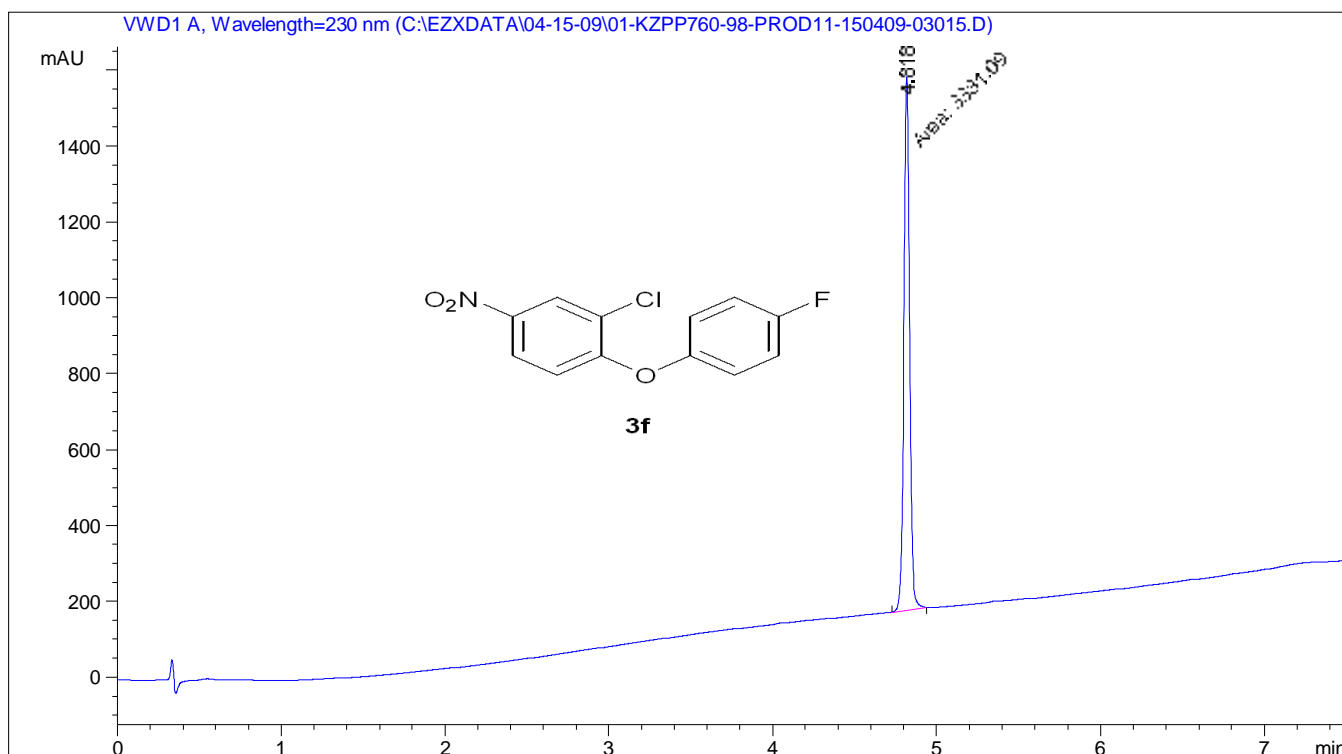

=====  
Area Percent Report  
=====

Sorted By : Signal  
Multiplier : 1.0000  
Dilution : 1.0000  
Use Multiplier & Dilution Factor with ISTDs

Signal 1: VWD1 A, Wavelength=230 nm

| Peak # | RetTime [min] | Type | Width [min] | Area mAU*s | Height [mAU] | Area %   |
|--------|---------------|------|-------------|------------|--------------|----------|
| 1      | 4.818         | MM   | 0.0395      | 3331.08789 | 1407.23096   | 100.0000 |

Totals : 3331.08789 1407.23096

Sample Name: 02-kzpp760-03-product

```

=====
Acq. Operator   : Jameel Marafie
Acq. Instrument : ACLC045
Injection Date  : 23/04/2009 09:45:51
Location       : Vial 66
Inj Volume     : 2 µl

Acq. Method    : C:\Chem32\1\METHODS\GENERIC3A.M
Last changed   : 23/04/2009 09:45:24 by Jameel Marafie
Analysis Method : C:\Chem32\1\METHODS\GENERIC3A.M
Last changed   : 25/06/2007 13:18:05 by JMoseley
Method Info    : Generic Method 3A
                  Polaris Amide, 3µm, 50 x 3.0mm
                  M.P.A: 0.03%TFA in Water, M.P.B: 0.03%TFA in ACN
                  Gradient: 5-95% in 6min, run time: 7.5min
                  Inj Vol.: 2ul, Det: 230nm, Flow: 1.25ml/min
    
```

Sample Info : =====  
 Column: 3 Polaris Amide

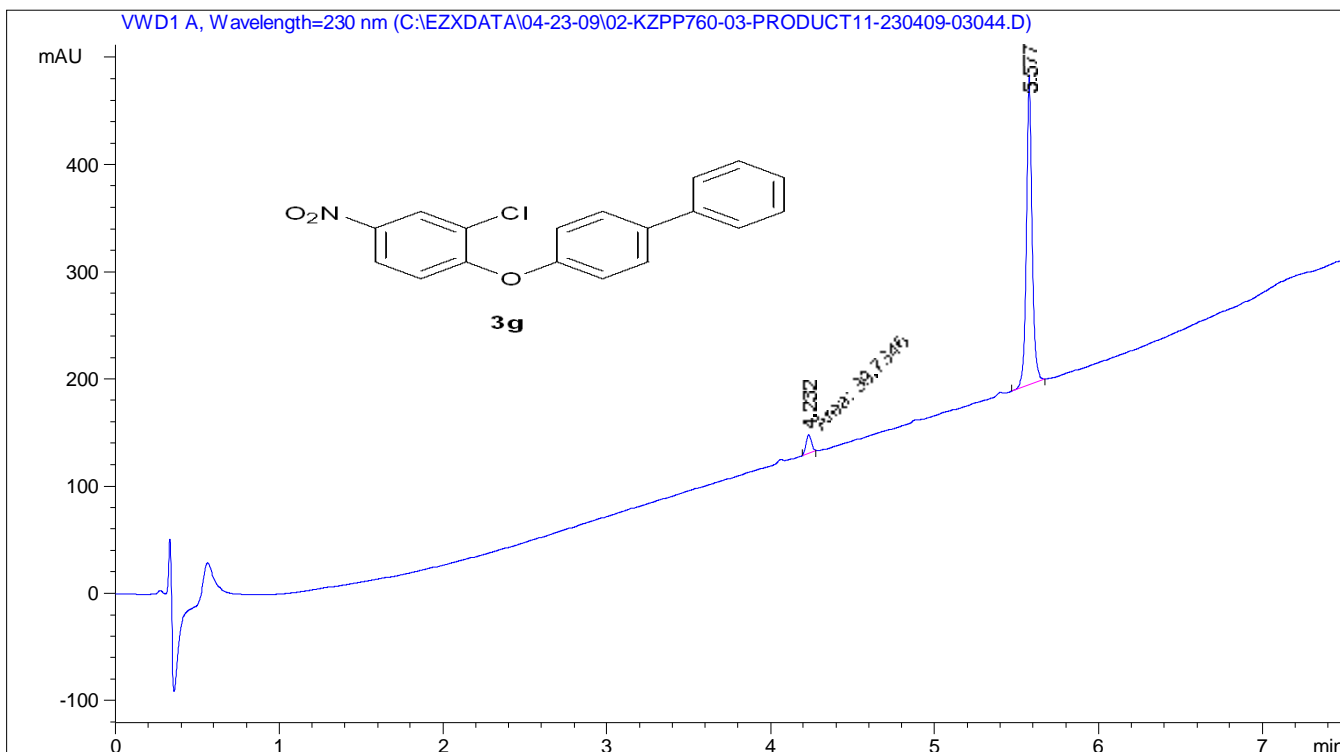

=====  
 Area Percent Report  
 =====

```

Sorted By      : Signal
Multiplier     : 1.0000
Dilution       : 1.0000
Use Multiplier & Dilution Factor with ISTDs
    
```

Signal 1: VWD1 A, Wavelength=230 nm

| Peak # | RetTime [min] | Type | Width [min] | Area mAU *s | Height [mAU] | Area %  |
|--------|---------------|------|-------------|-------------|--------------|---------|
| 1      | 4.232         | MM   | 0.0374      | 39.73460    | 17.72729     | 5.3386  |
| 2      | 5.577         | BB   | 0.0372      | 704.55798   | 288.83478    | 94.6614 |

Totals : 744.29258 306.56207

```

=====
Acq. Operator   : Jameel Marafie
Acq. Instrument : ACLC045
Injection Date  : 23/03/2009 09:31:42
Location       : Vial 2
Inj Volume     : 2 µl

Acq. Method    : C:\Chem32\1\METHODS\GENERIC3A.M
Last changed   : 23/03/2009 09:31:25 by Jameel Marafie
Analysis Method : C:\Chem32\1\METHODS\GENERIC3A.M
Last changed   : 25/06/2007 13:18:05 by JMoseley
Method Info    : Generic Method 3A
                  Polaris Amide, 3µm, 50 x 3.0mm
                  M.P.A: 0.03%TFA in Water, M.P.B: 0.03%TFA in ACN
                  Gradient: 5-95% in 6min, run time: 7.5min
                  Inj Vol.: 2ul, Det: 230nm, Flow: 1.25ml/min
    
```

Sample Info : =====  
 Column: 3 Polaris Amide

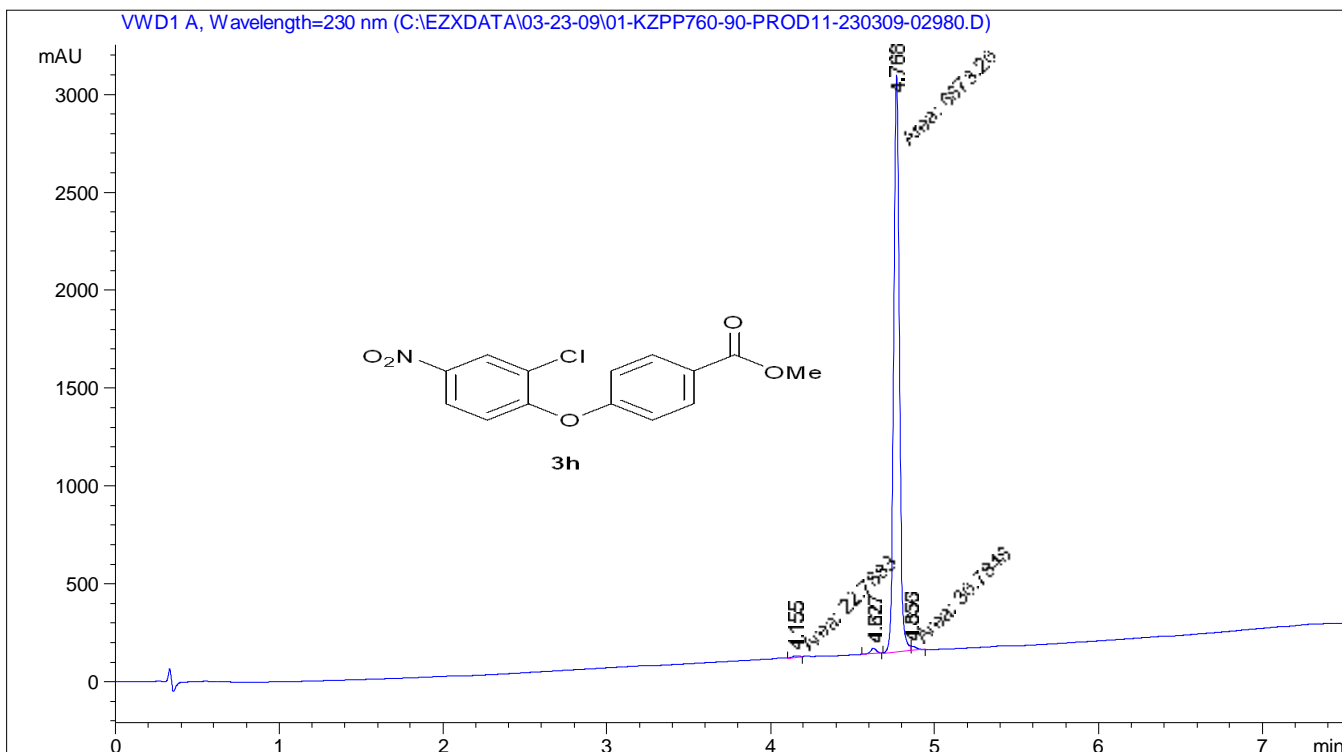

=====  
 Area Percent Report  
 =====

Sorted By : Signal  
 Multiplier : 1.0000  
 Dilution : 1.0000  
 Use Multiplier & Dilution Factor with ISTDs

Signal 1: VWD1 A, Wavelength=230 nm

| Peak # | RetTime [min] | Type | Width [min] | Area mAU*s | Height [mAU] | Area %  |
|--------|---------------|------|-------------|------------|--------------|---------|
| 1      | 4.155         | MM   | 0.0397      | 22.78828   | 9.56575      | 0.3259  |
| 2      | 4.627         | BB   | 0.0373      | 58.64497   | 24.55140     | 0.8388  |
| 3      | 4.768         | MF   | 0.0388      | 6873.26025 | 2948.87354   | 98.3091 |
| 4      | 4.856         | FM   | 0.0315      | 36.78483   | 19.44295     | 0.5261  |

Totals : 6991.47834 3002.43363



```

=====
Acq. Operator   : Jameel Marafie
Acq. Instrument : ACLC045
Injection Date  : 18/05/2009 11:33:37
Location       : Vial 59
Inj Volume     : 2 µl
Acq. Method    : C:\Chem32\1\METHODS\GENERIC3A.M
Last changed   : 18/05/2009 11:31:31 by Jameel Marafie
Analysis Method : C:\Chem32\1\METHODS\GENERIC3A.M
Last changed   : 25/06/2007 13:18:05 by JMoseley
Method Info    : Generic Method 3A
                  Polaris Amide, 3µm, 50 x 3.0mm
                  M.P.A: 0.03%TFA in Water, M.P.B: 0.03%TFA in ACN
                  Gradient: 5-95% in 6min, run time: 7.5min
                  Inj Vol.: 2ul, Det: 230nm, Flow: 1.25ml/min
    
```

```

Sample Info : =====
                  Column: 3 Polaris Amide
    
```

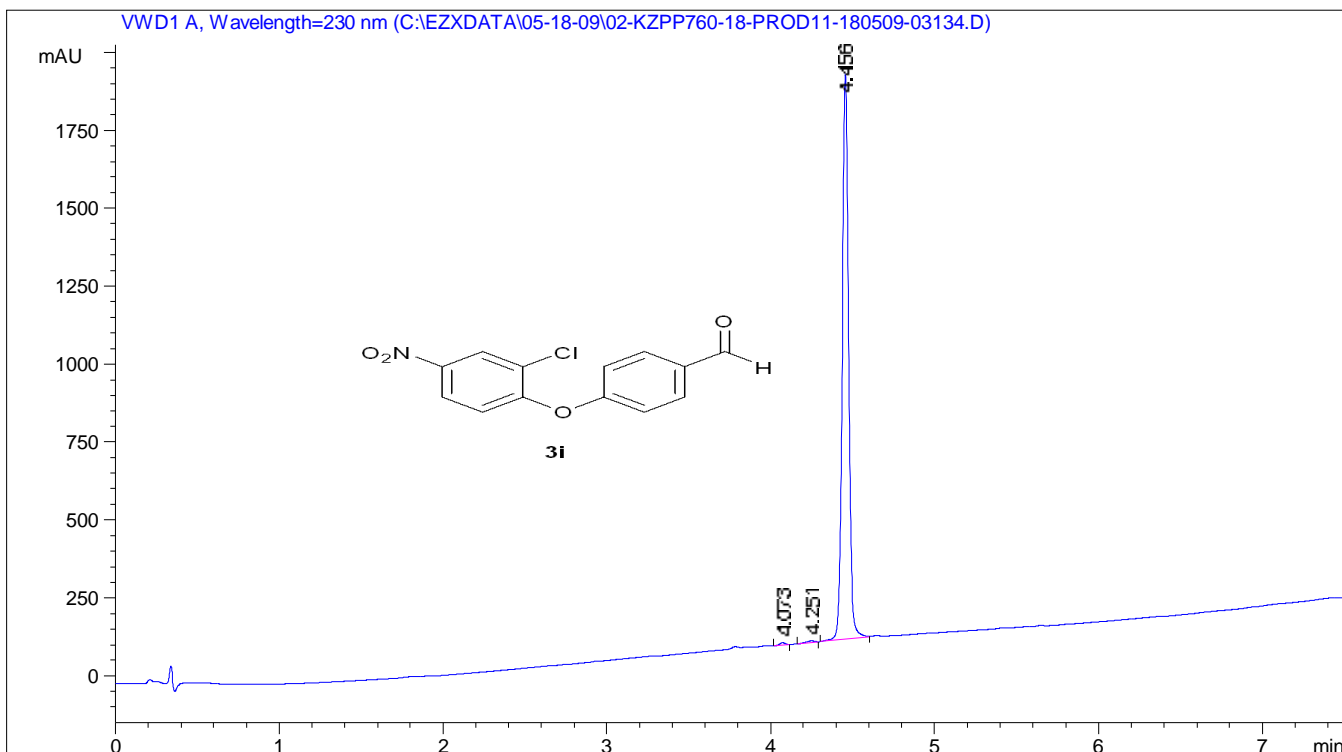

=====  
 Area Percent Report  
 =====

```

Sorted By      : Signal
Multiplier     : 1.0000
Dilution       : 1.0000
Use Multiplier & Dilution Factor with ISTDs
    
```

Signal 1: VWD1 A, Wavelength=230 nm

| Peak # | RetTime [min] | Type | Width [min] | Area mAU*s | Height [mAU] | Area %  |
|--------|---------------|------|-------------|------------|--------------|---------|
| 1      | 4.073         | BB   | 0.0392      | 19.39723   | 7.80661      | 0.3974  |
| 2      | 4.251         | BB   | 0.0520      | 16.78536   | 4.94290      | 0.3439  |
| 3      | 4.456         | BV   | 0.0407      | 4844.61963 | 1808.30762   | 99.2587 |

Totals : 4880.80221 1821.05713

```

=====
Acq. Operator   : Jameel Marafie
Acq. Instrument : ACLC045
Injection Date  : 27/03/2009 08:59:51
Location       : Vial 22
Inj Volume     : 2 µl

Acq. Method    : C:\Chem32\1\METHODS\GENERIC3A.M
Last changed   : 27/03/2009 08:57:44 by Jameel Marafie
Analysis Method: C:\Chem32\1\METHODS\GENERIC3A.M
Last changed   : 25/06/2007 13:18:05 by JMoseley
Method Info    : Generic Method 3A
                  Polaris Amide, 3µm, 50 x 3.0mm
                  M.P.A: 0.03%TFA in Water, M.P.B: 0.03%TFA in ACN
                  Gradient: 5-95% in 6min, run time: 7.5min
                  Inj Vol.: 2ul, Det: 230nm, Flow: 1.25ml/min
    
```

Sample Info : =====  
 Column: 3 Polaris Amide

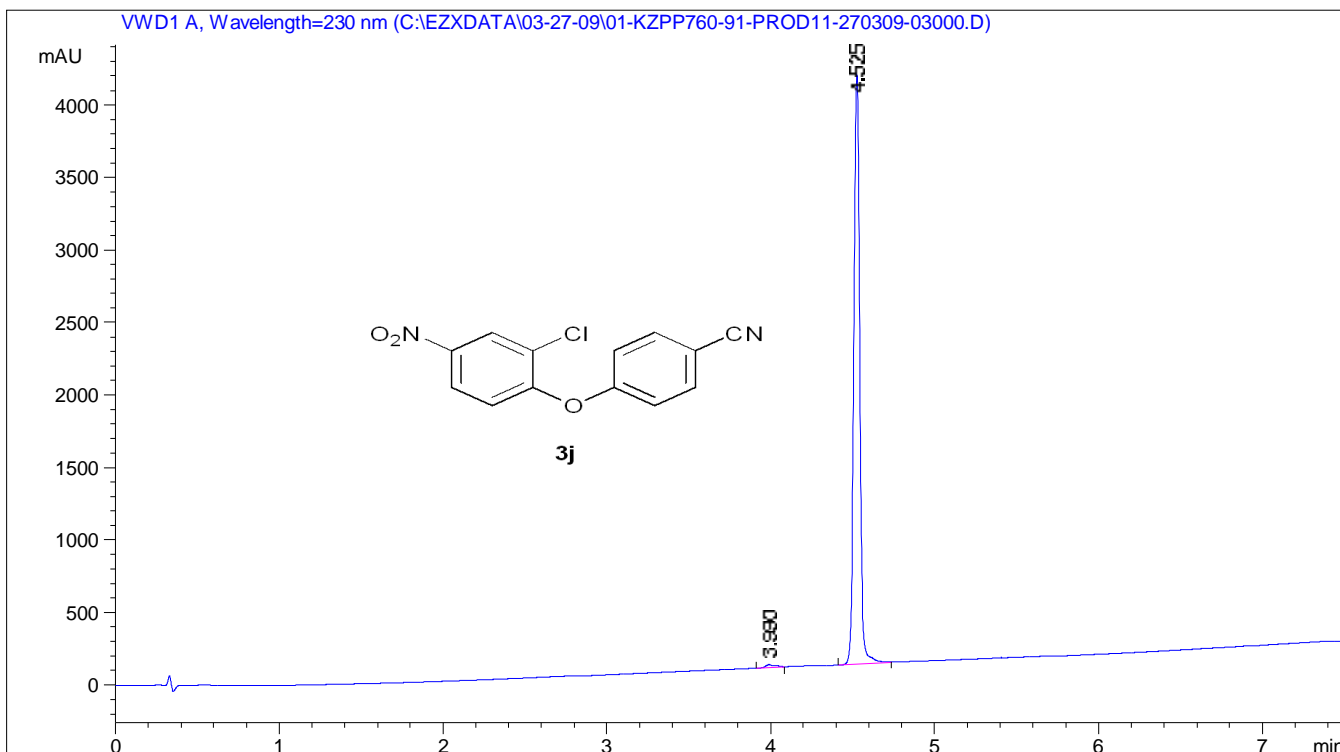

=====  
 Area Percent Report  
 =====

```

Sorted By      : Signal
Multiplier     : 1.0000
Dilution       : 1.0000
Use Multiplier & Dilution Factor with ISTDs
    
```

Signal 1: VWD1 A, Wavelength=230 nm

| Peak # | RetTime [min] | Type | Width [min] | Area mAU*s | Height [mAU] | Area %  |
|--------|---------------|------|-------------|------------|--------------|---------|
| 1      | 3.990         | BB   | 0.0503      | 80.75111   | 23.04885     | 0.7992  |
| 2      | 4.525         | BV   | 0.0383      | 1.00231e4  | 4061.65015   | 99.2008 |

Totals : 1.01039e4 4084.69899

```

=====
Acq. Operator   : Jameel Marafie
Acq. Instrument : ACLC045
Injection Date  : 05/05/2009 11:25:03
Location       : Vial 19
Inj Volume    : 2 µl

Acq. Method    : C:\Chem32\1\METHODS\GENERIC3A.M
Last changed   : 05/05/2009 11:22:43 by Jameel Marafie
Analysis Method : C:\Chem32\1\METHODS\GENERIC3A.M
Last changed   : 25/06/2007 13:18:05 by JMoseley
Method Info    : Generic Method 3A
                  Polaris Amide, 3µm, 50 x 3.0mm
                  M.P.A: 0.03%TFA in Water, M.P.B: 0.03%TFA in ACN
                  Gradient: 5-95% in 6min, run time: 7.5min
                  Inj Vol.: 2ul, Det: 230nm, Flow: 1.25ml/min
    
```

Sample Info : =====  
 Column: 3 Polaris Amide

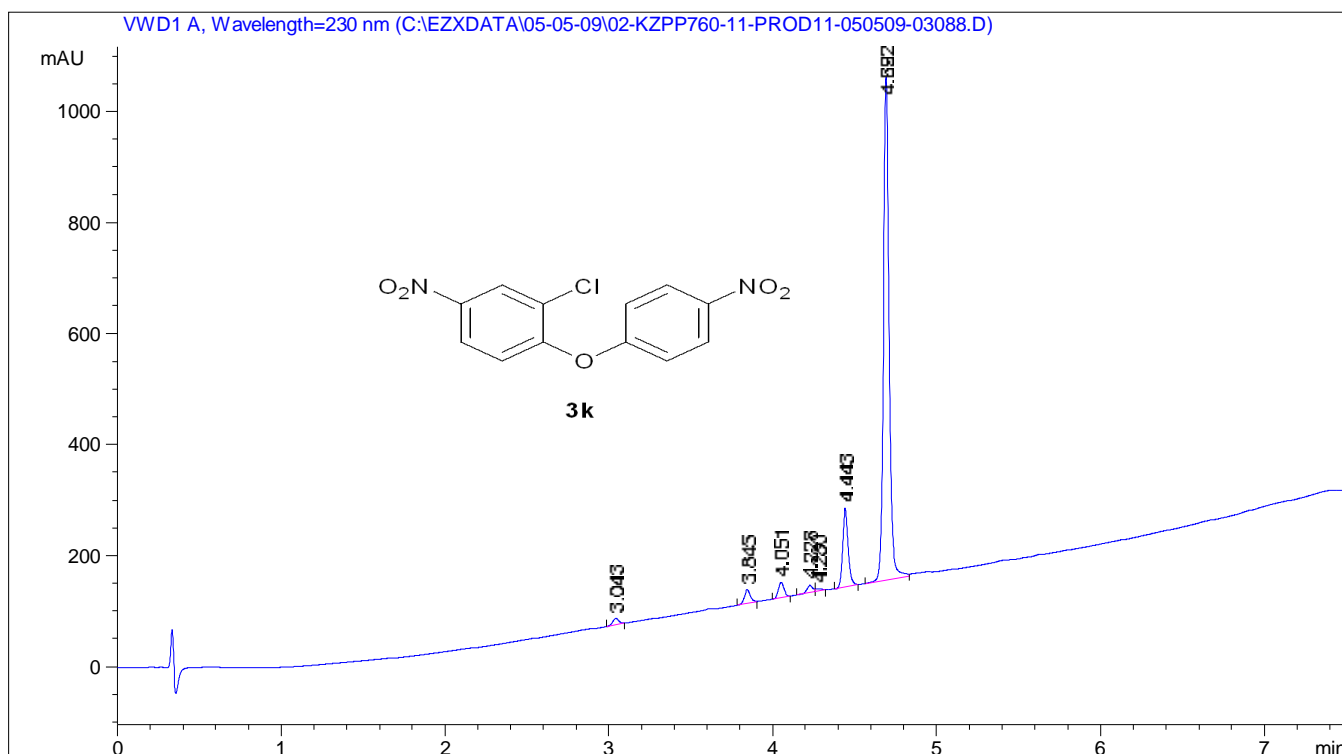

=====  
 Area Percent Report  
 =====

Sorted By : Signal  
 Multiplier : 1.0000  
 Dilution : 1.0000  
 Use Multiplier & Dilution Factor with ISTDs

Signal 1: VWD1 A, Wavelength=230 nm

| Peak # | RetTime [min] | Type | Width [min] | Area mAU *s | Height [mAU] | Area %  |
|--------|---------------|------|-------------|-------------|--------------|---------|
| 1      | 3.043         | BB   | 0.0397      | 27.09153    | 10.69336     | 0.9954  |
| 2      | 3.845         | BB   | 0.0386      | 61.07278    | 24.44015     | 2.2440  |
| 3      | 4.051         | BB   | 0.0366      | 63.80969    | 27.46606     | 2.3445  |
| 4      | 4.228         | BV   | 0.0368      | 31.88045    | 13.25194     | 1.1714  |
| 5      | 4.280         | VB   | 0.0356      | 11.10467    | 4.68768      | 0.4080  |
| 6      | 4.443         | BB   | 0.0358      | 329.19266   | 142.03198    | 12.0954 |

Data File C:\EZXDATA\05-05-09\02-KZPP760-11-PROD11-050509-03088.D  
This journal is © The Royal Society of Chemistry 2010  
Sample Name: 02-kzpp760-11-prod

| Peak # | RetTime [min] | Type | Width [min] | Area mAU *s | Height [mAU] | Area %  |
|--------|---------------|------|-------------|-------------|--------------|---------|
| 7      | 4.692         | BV   | 0.0370      | 2197.48828  | 905.79956    | 80.7413 |

Totals : 2721.64005 1128.37073

=====  
\*\*\* End of Report \*\*\*

```

=====
Acq. Operator   : Jameel Marafie
Acq. Instrument : ACLC045
Injection Date  : 26/05/2009 09:05:16
Location       : Vial 85
Inj Volume     : 2 µl

Acq. Method    : C:\Chem32\1\METHODS\GENERIC3A.M
Last changed   : 26/05/2009 09:03:20 by Jameel Marafie
Analysis Method : C:\Chem32\1\METHODS\GENERIC3A.M
Last changed   : 25/06/2007 13:18:05 by JMoseley
Method Info    : Generic Method 3A
                  Polaris Amide, 3µm, 50 x 3.0mm
                  M.P.A: 0.03%TFA in Water, M.P.B: 0.03%TFA in ACN
                  Gradient: 5-95% in 6min, run time: 7.5min
                  Inj Vol.: 2ul, Det: 230nm, Flow: 1.25ml/min
    
```

Sample Info : =====  
 Column: 3 Polaris Amide

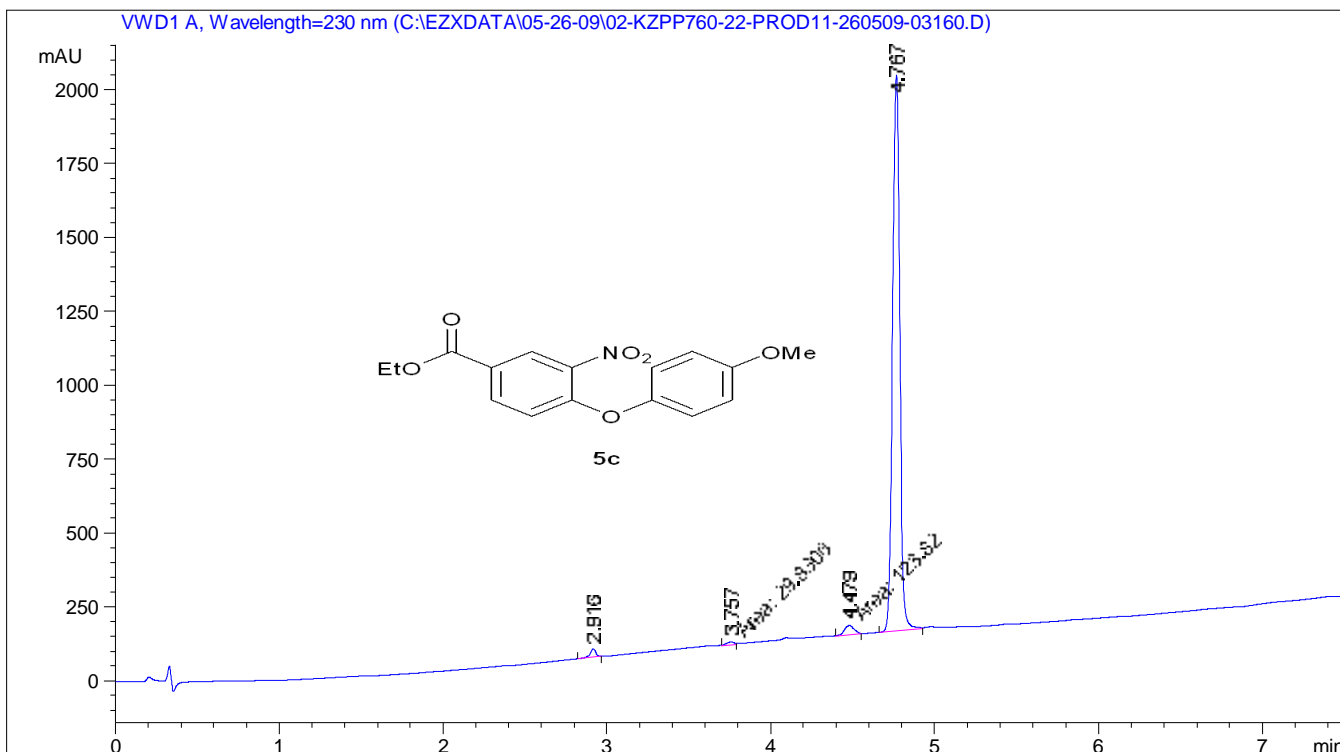

=====  
 Area Percent Report  
 =====

Sorted By : Signal  
 Multiplier : 1.0000  
 Dilution : 1.0000  
 Use Multiplier & Dilution Factor with ISTDs

Signal 1: VWD1 A, Wavelength=230 nm

| Peak # | RetTime [min] | Type | Width [min] | Area mAU*s | Height [mAU] | Area %  |
|--------|---------------|------|-------------|------------|--------------|---------|
| 1      | 2.916         | BB   | 0.0364      | 65.57475   | 27.60541     | 1.1145  |
| 2      | 3.757         | MM   | 0.0555      | 29.83058   | 8.96049      | 0.5070  |
| 3      | 4.479         | MM   | 0.0641      | 123.82004  | 32.18771     | 2.1045  |
| 4      | 4.767         | BV   | 0.0468      | 5664.37305 | 1878.83118   | 96.2740 |

Totals : 5883.59841 1947.58478

```

=====
Acq. Operator   : Jameel Marafie
Acq. Instrument : ACLC045
Injection Date  : 04/06/2009 08:28:18
Location        : Vial 54
Inj Volume     : 2 µl
Acq. Method    : C:\Chem32\1\METHODS\GENERIC3A.M
Last changed   : 04/06/2009 08:26:01 by Jameel Marafie
Analysis Method : C:\Chem32\1\METHODS\GENERIC3A.M
Last changed   : 25/06/2007 13:18:05 by JMoseley
Method Info    : Generic Method 3A
                  Polaris Amide, 3µm, 50 x 3.0mm
                  M.P.A: 0.03%TFA in Water, M.P.B: 0.03%TFA in ACN
                  Gradient: 5-95% in 6min, run time: 7.5min
                  Inj Vol.: 2ul, Det: 230nm, Flow: 1.25ml/min
    
```

```

Sample Info : =====
                  Column: 3 Polaris Amide
    
```

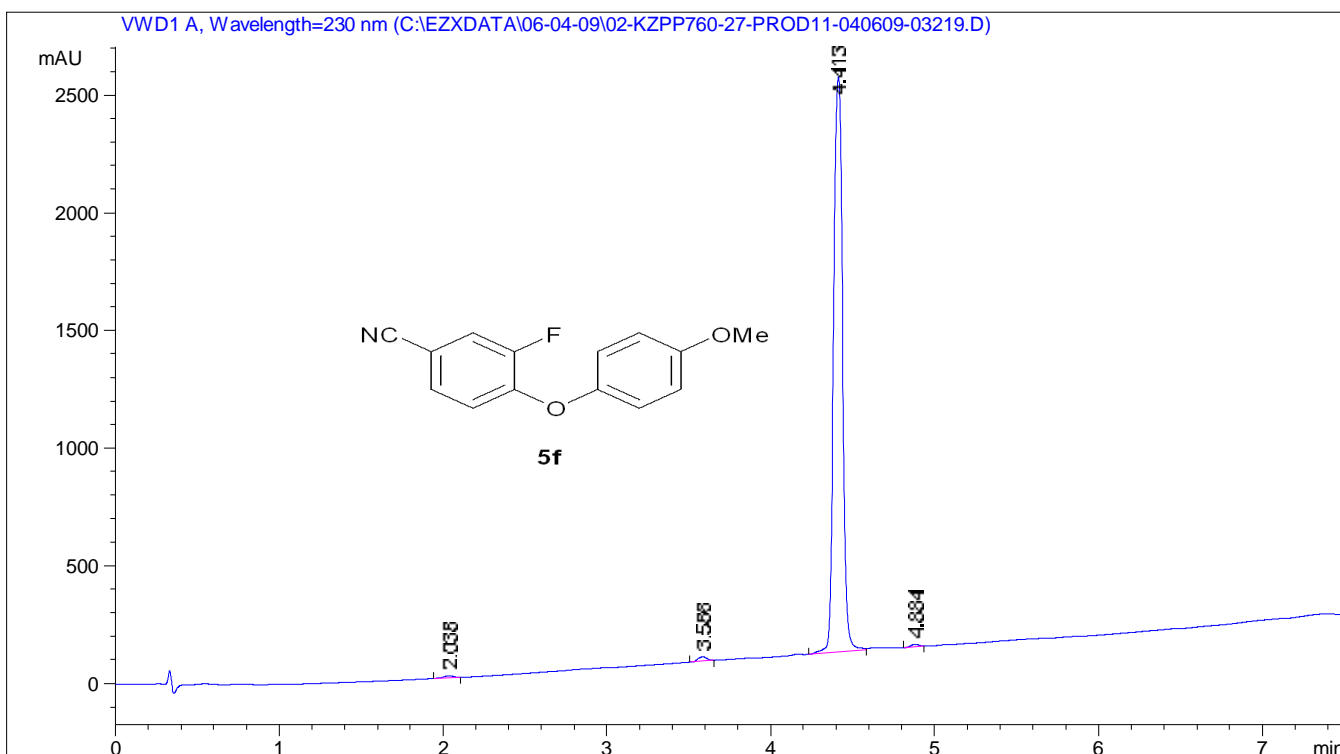

=====  
 Area Percent Report  
 =====

```

Sorted By      : Signal
Multiplier     : 1.0000
Dilution       : 1.0000
Use Multiplier & Dilution Factor with ISTDs
    
```

Signal 1: VWD1 A, Wavelength=230 nm

| Peak # | RetTime [min] | Type | Width [min] | Area mAU*s | Height [mAU] | Area %  |
|--------|---------------|------|-------------|------------|--------------|---------|
| 1      | 2.038         | BB   | 0.0735      | 42.95218   | 9.42869      | 0.4583  |
| 2      | 3.586         | BB   | 0.0568      | 72.01972   | 20.62631     | 0.7685  |
| 3      | 4.413         | BV   | 0.0608      | 9223.35938 | 2442.05225   | 98.4207 |
| 4      | 4.884         | BB   | 0.0587      | 33.02755   | 9.19337      | 0.3524  |

Totals : 9371.35883 2481.30062

=====  
Acq. Operator : Jameel Marafie  
Acq. Instrument : ACLC045 Location : Vial 31  
Injection Date : 15/06/2009 09:58:36 Inj Volume : 2 µl  
Acq. Method : C:\Chem32\1\METHODS\GENERIC3A.M  
Last changed : 15/06/2009 09:58:05 by Jameel Marafie  
Analysis Method : C:\Chem32\1\METHODS\GENERIC3A.M  
Last changed : 25/06/2007 13:18:05 by JMoseley  
Method Info : Generic Method 3A  
Polaris Amide, 3µm, 50 x 3.0mm  
M.P.A: 0.03%TFA in Water, M.P.B: 0.03%TFA in ACN  
Gradient: 5-95% in 6min, run time: 7.5min  
Inj Vol.: 2ul, Det: 230nm, Flow: 1.25ml/min

Sample Info : =====  
Column: 3 Polaris Amide

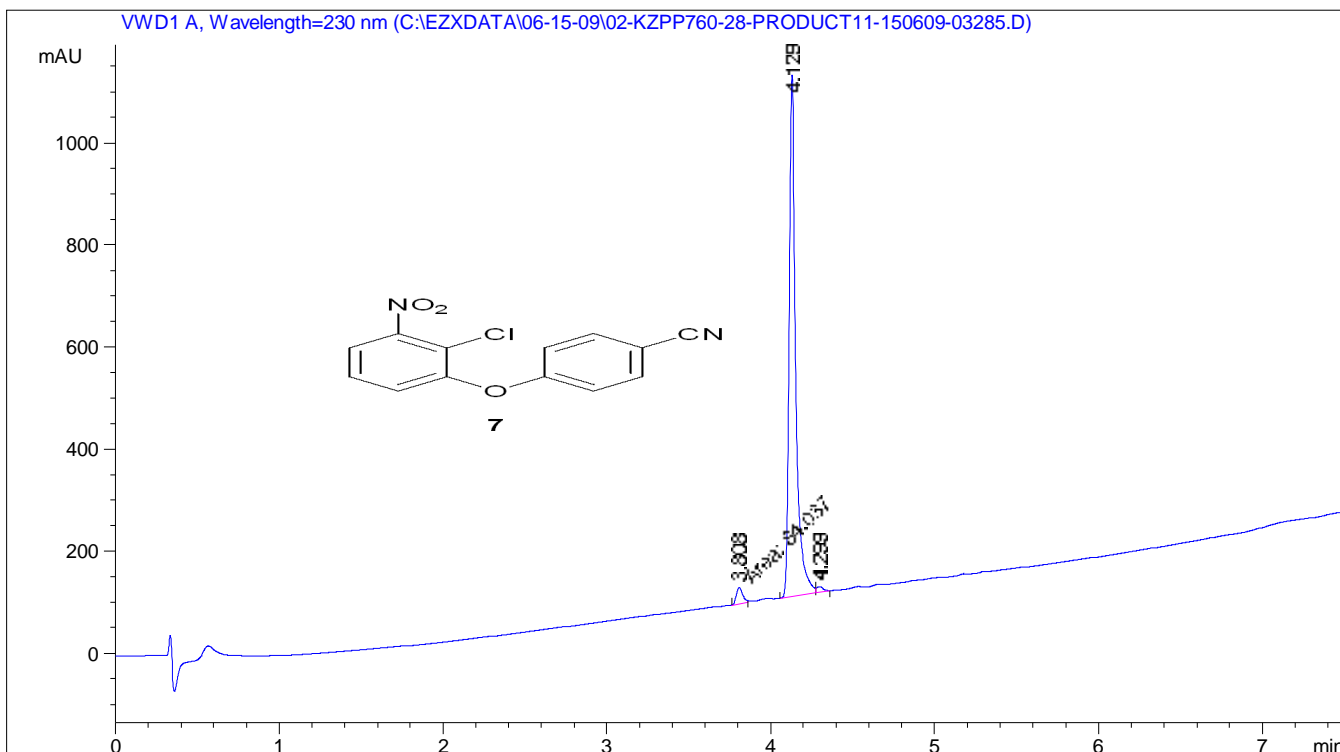

=====  
Area Percent Report  
=====

Sorted By : Signal  
Multiplier : 1.0000  
Dilution : 1.0000  
Use Multiplier & Dilution Factor with ISTDs

Signal 1: VWD1 A, Wavelength=230 nm

| Peak # | RetTime [min] | Type | Width [min] | Area mAU*s | Height [mAU] | Area %  |
|--------|---------------|------|-------------|------------|--------------|---------|
| 1      | 3.808         | MM   | 0.0441      | 84.03696   | 31.75223     | 2.8340  |
| 2      | 4.129         | BV   | 0.0420      | 2852.31641 | 1022.00897   | 96.1890 |
| 3      | 4.299         | VB   | 0.0409      | 28.97014   | 10.52226     | 0.9770  |

Totals : 2965.32351 1064.28346

Sample Name: 02-kzpp760-49-prod3

Supplementary Material (ESI) for Organic &amp; Biomolecular Chemistry

This journal is © The Royal Society of Chemistry 2010

```

=====
Acq. Operator   : Jameel Marafie
Acq. Instrument : ACLC045
Injection Date  : 25/08/2009 13:53:50
Location       : Vial 46
Inj Volume     : 2 µl
Acq. Method    : C:\Chem32\1\METHODS\GENERIC3A.M
Last changed   : 25/08/2009 13:53:07 by Jameel Marafie
Analysis Method : C:\Chem32\1\METHODS\STANDBY.M
Last changed   : 03/11/2009 17:14:32 by JMoseley
Method Info    : Standby method
=====

```

```

Sample Info : =====
              Column: 3 Polaris Amide
=====

```

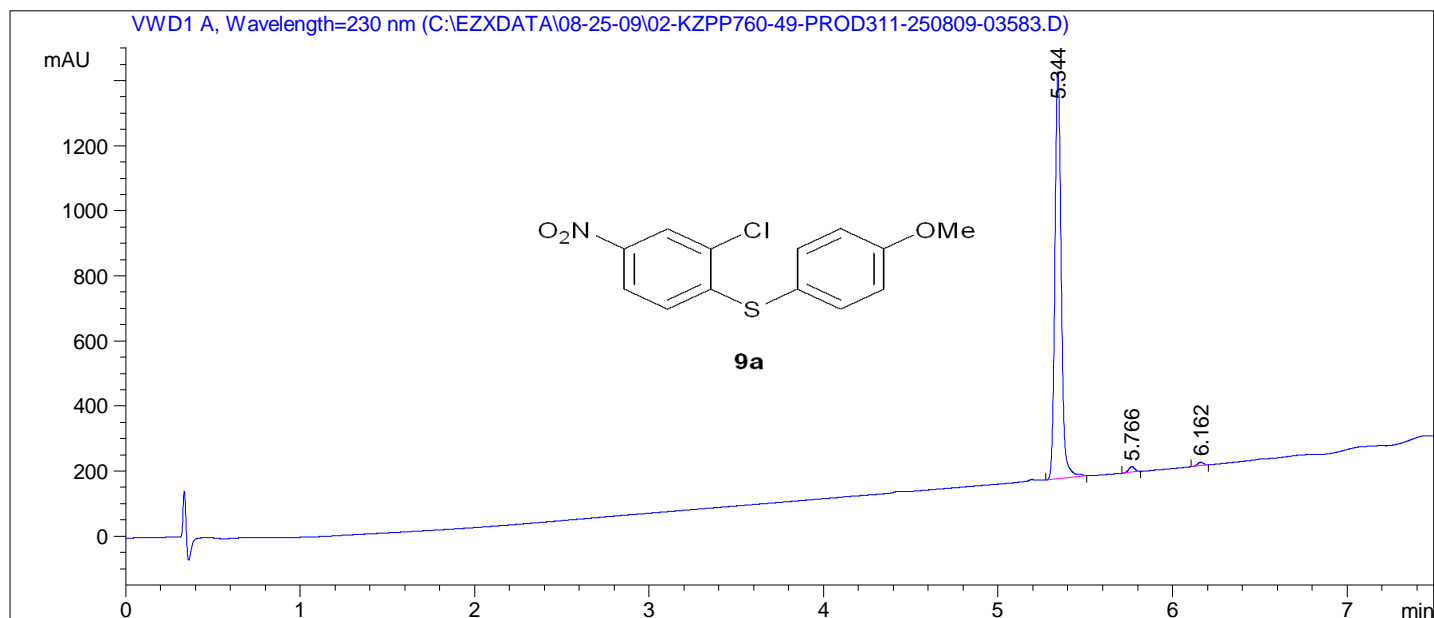

```

=====
Area Percent Report
=====

```

```

Sorted By      : Signal
Multiplier     : 1.0000
Dilution       : 1.0000
Use Multiplier & Dilution Factor with ISTDs

```

Signal 1: VWD1 A, Wavelength=230 nm

| Peak # | RetTime [min] | Type | Width [min] | Area mAU*s | Height [mAU] | Area %  |
|--------|---------------|------|-------------|------------|--------------|---------|
| 1      | 5.344         | BB   | 0.0398      | 3172.07739 | 1250.88013   | 97.9217 |
| 2      | 5.766         | BB   | 0.0386      | 42.80312   | 17.59350     | 1.3213  |
| 3      | 6.162         | BB   | 0.0383      | 24.52017   | 10.18733     | 0.7569  |

```
Totals :                3239.40068 1278.66096
```

```

=====
Summed Peaks Report
=====

```

Signal 1: VWD1 A, Wavelength=230 nm
