# Supplementary figures and images for: The application of stop-flow microwave technology to scaling-out SNAr reactions using a soluble organic base
Source: Royal Society of Chemistry journal article supplement (doi:10.1039/b926537f), 2010-01-01

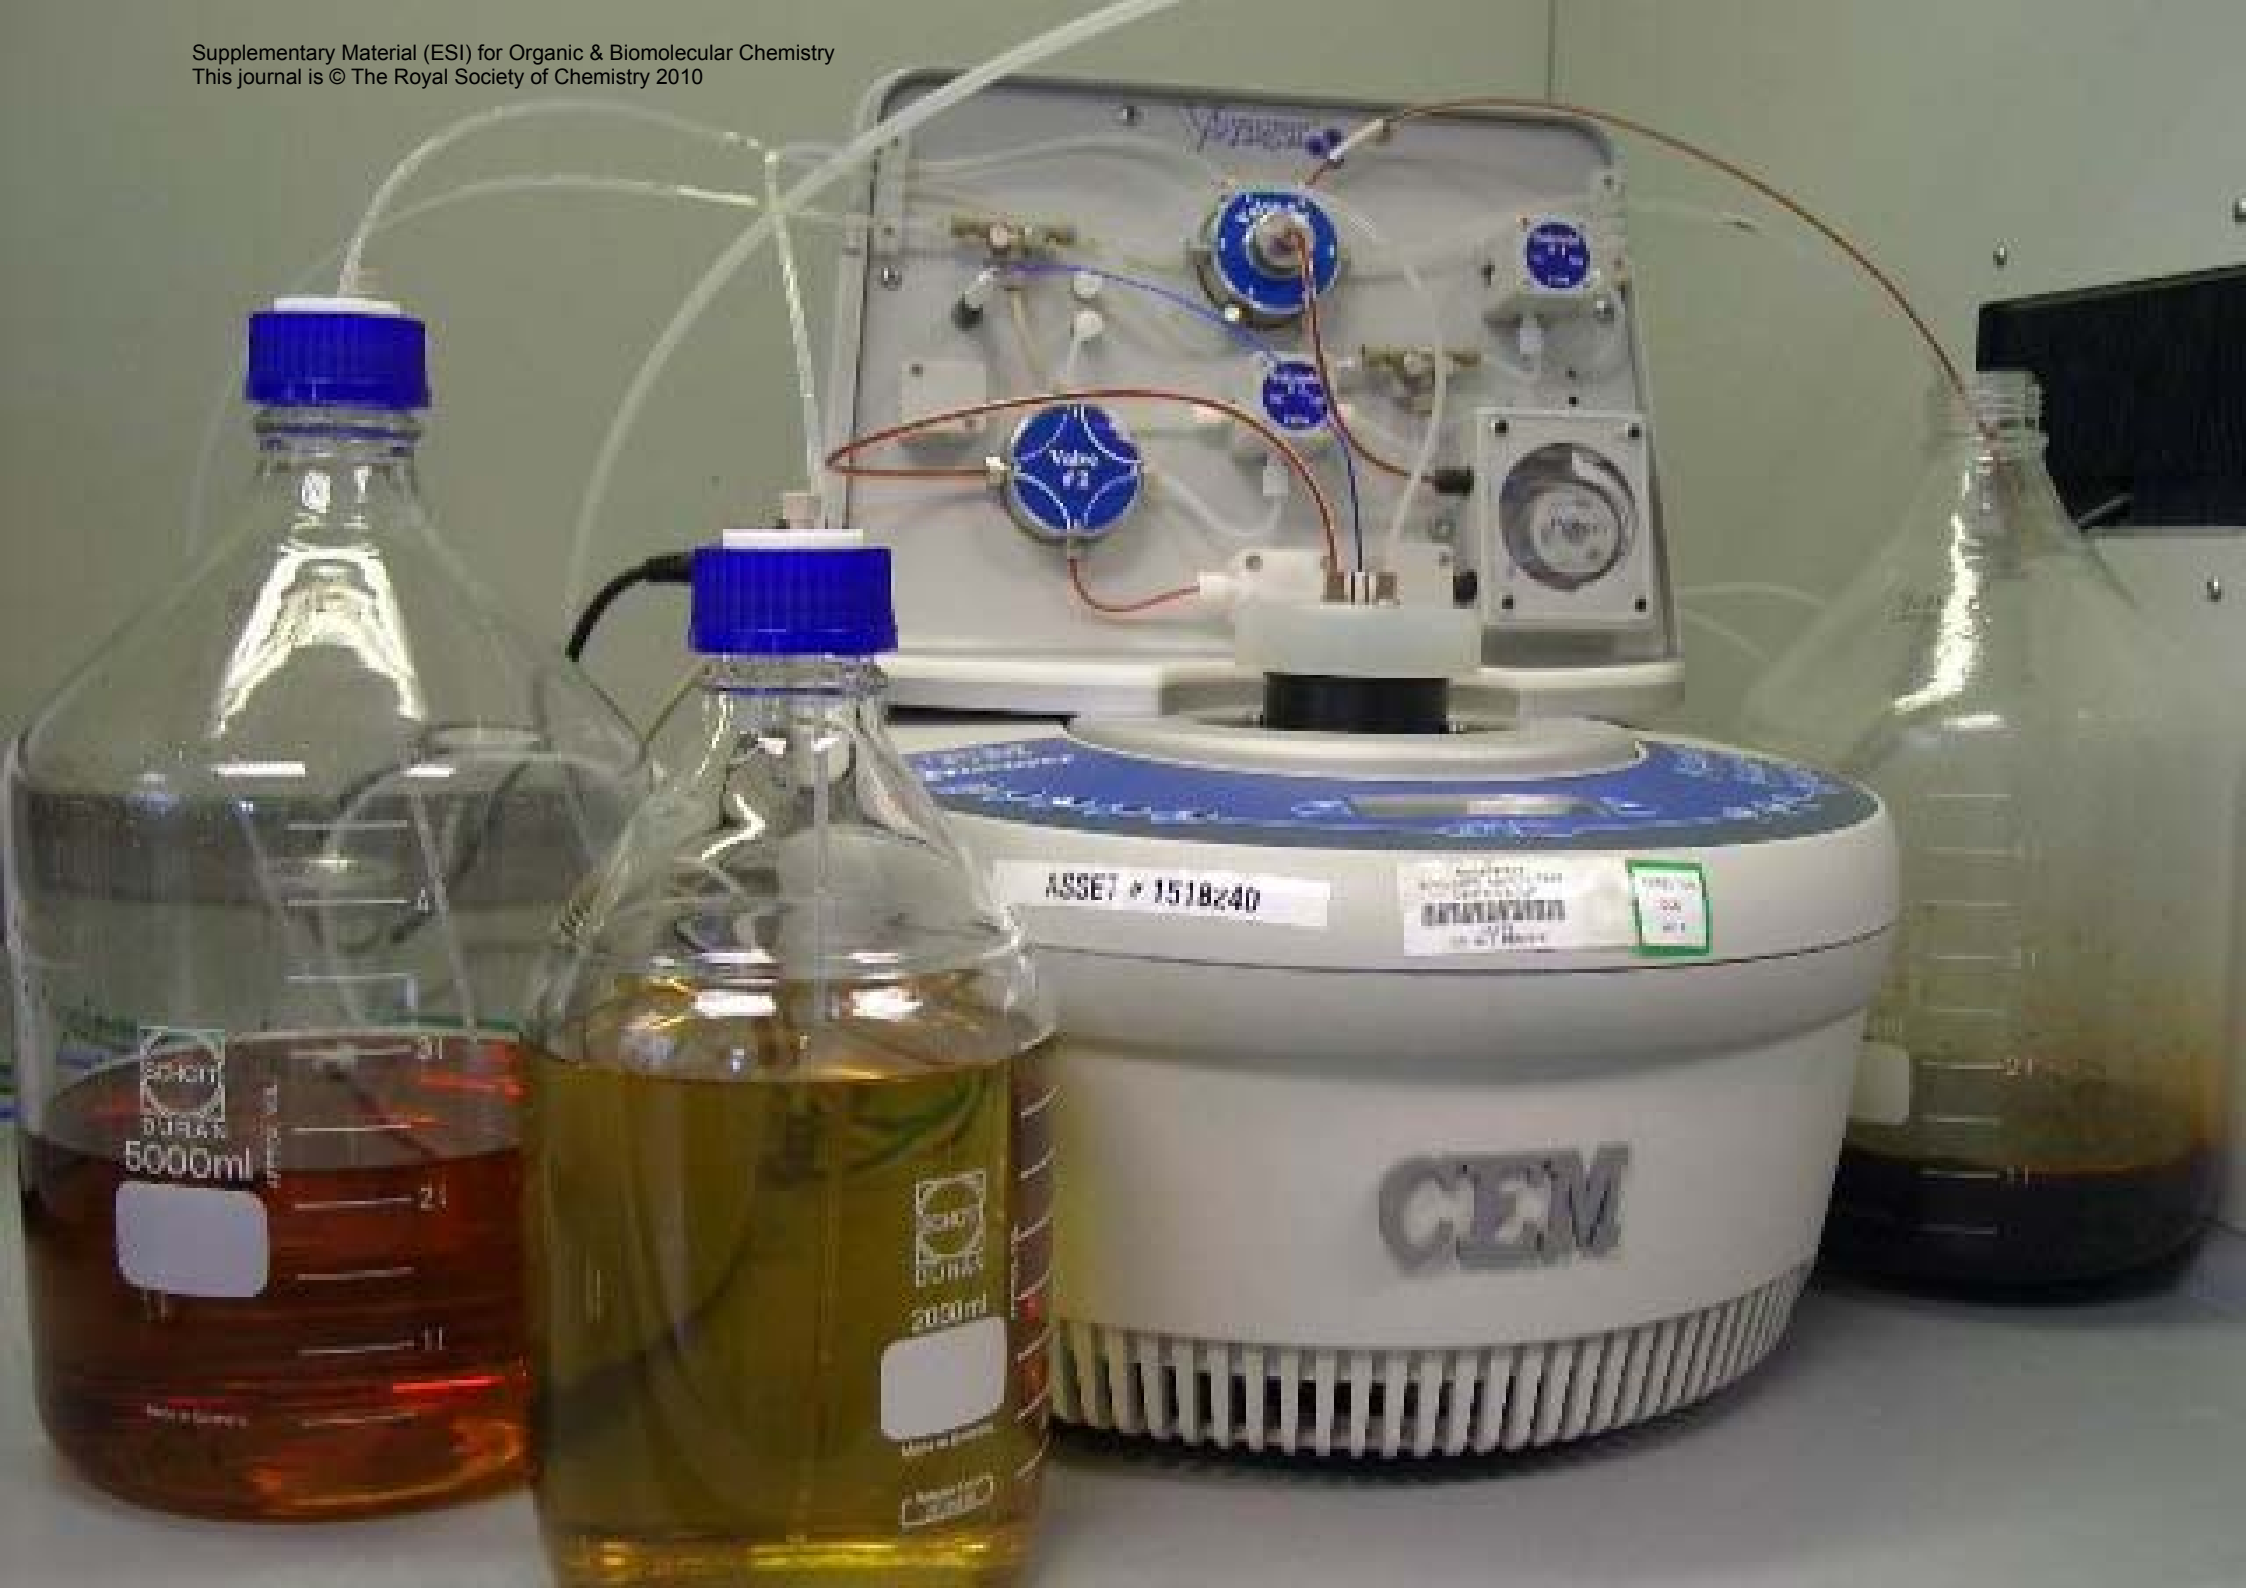

Supplement: b926537f voyager_photo.pdf [file b926537f%20voyager_photo.pdf]
